# Supplementary material for: Impact of dissolved organic matter on mercury and methylmercury sorption to activated carbon in soils: implications for remediation
Source: Royal Society of Chemistry journal article supplement (doi:10.1039/c8em00469b), 2019-01-01
Supplement: c8em00469b2.xlsx [file c8em00469b2.xlsx]

## Sheet: thiol density calculations
Estimation of SR content of soil DOM and soil+SRHA
				mmole S/mol C
DOM S content from Poulin 2017			low SO4:	9	fraction of S as exocyclic increases with SO4/HS concentration of site
for hydrophobic acid fraction only			hi SO4:	14
for Everglades pore water DOM
HPOA fraction of Everglades NOM is 46-52%
For Berry's Creek soils:
	For these 5 ppt salinity, highly sulfidic soils I think we can assume we are at the top end of the Everglades range
	So	14	mmole S/mol C
		50	% exocylic C
	These values reflect the already sulfidized nature of BCSA soil DOM
	Then assume that HPOA is half of all NOM; and that the residual NOM has NO S content (a conservative assumption to balance using the highest S values in the Everglades data set)
SRHA	SRHA S:C IHSS		Reference, Graham et al 2017
	mmol/mol	4.14
	percent exocyclic S	23.6
					SHRA		Native BCSA soil NOM
						Corrected to 23.6
			measured		from SRHA	from SRHA	DOC
Average of VALUE			mg/L	mg/L	mol/L C	mol SR/L	mg/L	mol C/L
HG SPIKE	DOC Conc	TIME POINT	Total DOC	SRHA DOC mg/L	SRHA DOC mol C/L	SRHA mol SR/L	Native DOC mg/L	Native DOC mol C/L	Native DOC mol S/L	Native DOC mol RS/L
201Hg	High DOC Cold	T0	8.896	5.618	0.000468167	4.57418e-07	3.278	0.000273167	1.91217e-06	9.56083e-07
201Hg	High DOC Cold	T1	18.668	15.289	0.00127408	1.24483e-06	3.379	0.000281583	1.97108e-06	9.85542e-07
201Hg	High DOC Cold	T2	16.62	12.833	0.00106942	1.04486e-06	3.787	0.000315583	2.20908e-06	1.10454e-06
201Hg	High DOC Cold	T3	14.894	12.668	0.00105567	1.03143e-06	2.226	0.0001855	1.2985e-06	6.4925e-07
201Hg	High DOC Cold	T4	13.89	11.288	0.000940667	9.19069e-07	2.602	0.000216833	1.51783e-06	7.58917e-07
201Hg	Low DOC Cold	T0	6.953	3.675	0.00030625	2.99219e-07	9.189	0.00076575	5.36025e-06	2.68013e-06
201Hg	Low DOC Cold	T1	7.455	4.076	0.000339667	3.31868e-07	12.328	0.00102733	7.19133e-06	3.59567e-06
201Hg	Low DOC Cold	T2	4.497	0.71	5.91667e-05	5.78082e-08	9.767	0.000813917	5.69742e-06	2.84871e-06
201Hg	Low DOC Cold	T3	4.495	2.269	0.000189083	1.84742e-07	8.104	0.000675333	4.72733e-06	2.36367e-06
201Hg	Low DOC Cold	T4	4.16	1.558	0.000129833	1.26852e-07	8.828	0.000735667	5.14967e-06	2.57483e-06
201Hg	Mid DOC Cold	T0	7.994	4.716	0.000393	3.83977e-07	7.704	0.000642	4.494e-06	2.247e-06
201Hg	Mid DOC Cold	T1	8.548	5.169	0.00043075	4.2086e-07	6.16	0.000513333	3.59333e-06	1.79667e-06
201Hg	Mid DOC Cold	T2	7.656	3.869	0.000322417	3.15014e-07	15.776	0.00131467	9.20267e-06	4.60133e-06
201Hg	Mid DOC Cold	T3	6.814	4.588	0.000382333	3.73555e-07	12.788	0.00106567	7.45967e-06	3.72983e-06
201Hg	Mid DOC Cold	T4	6.43	3.828	0.000319	3.11676e-07	10.4	0.000866667	6.06667e-06	3.03333e-06
201Hg	No DOC Cold	T0	3.278	0	0	0	3.278	0.000273167	1.91217e-06	9.56083e-07
201Hg	No DOC Cold	T1	3.379	0	0	0	3.379	0.000281583	1.97108e-06	9.85542e-07
201Hg	No DOC Cold	T2	3.787	0	0	0	3.787	0.000315583	2.20908e-06	1.10454e-06
201Hg	No DOC Cold	T3	2.226	0	0	0	2.226	0.0001855	1.2985e-06	6.4925e-07
201Hg	No DOC Cold	T4	2.602	0	0	0	2.602	0.000216833	1.51783e-06	7.58917e-07
201Hg	No DOC/No AC	T0	9.189	0	0	0	9.189	0.00076575	5.36025e-06	2.68013e-06
201Hg	No DOC/No AC	T1	12.328	0	0	0	12.328	0.00102733	7.19133e-06	3.59567e-06
201Hg	No DOC/No AC	T2	9.767	0	0	0	9.767	0.000813917	5.69742e-06	2.84871e-06
201Hg	No DOC/No AC	T3	8.104	0	0	0	8.104	0.000675333	4.72733e-06	2.36367e-06
201Hg	No DOC/No AC	T4	8.828	0	0	0	8.828	0.000735667	5.14967e-06	2.57483e-06
Me199Hg	High DOC Cold	T0	7.704	4.174	0.000347833	3.39847e-07	3.53	0.000294167	2.05917e-06	1.02958e-06
Me199Hg	High DOC Cold	T1	6.16	2.967	0.00024725	2.41573e-07	3.193	0.000266083	1.86258e-06	9.31292e-07
Me199Hg	High DOC Cold	T2	15.776	13.266	0.0011055	1.08012e-06	2.51	0.000209167	1.46417e-06	7.32083e-07
Me199Hg	High DOC Cold	T3	12.788	9.451	0.000787583	7.695e-07	3.337	0.000278083	1.94658e-06	9.73292e-07
Me199Hg	High DOC Cold	T4	10.4	7.86	0.000655	6.39961e-07	2.54	0.000211667	1.48167e-06	7.40833e-07
Me199Hg	Low DOC Cold	T0	8.135	4.605	0.00038375	3.74939e-07	3.53	0.000294167	2.05917e-06	1.02958e-06
Me199Hg	Low DOC Cold	T1	5.341	2.148	0.000179	1.7489e-07	3.193	0.000266083	1.86258e-06	9.31292e-07
Me199Hg	Low DOC Cold	T2	4.927	2.417	0.000201417	1.96792e-07	2.51	0.000209167	1.46417e-06	7.32083e-07
Me199Hg	Low DOC Cold	T3	4.795	1.458	0.0001215	1.1871e-07	3.337	0.000278083	1.94658e-06	9.73292e-07
Me199Hg	Low DOC Cold	T4	3.745	1.205	0.000100417	9.81111e-08	2.54	0.000211667	1.48167e-06	7.40833e-07
Me199Hg	Mid DOC Cold	T0	8.448	4.918	0.000409833	4.00424e-07	3.53	0.000294167	2.05917e-06	1.02958e-06
Me199Hg	Mid DOC Cold	T1	9.148	5.955	0.00049625	4.84856e-07	3.193	0.000266083	1.86258e-06	9.31292e-07
Me199Hg	Mid DOC Cold	T2	8.644	6.134	0.000511167	4.9943e-07	2.51	0.000209167	1.46417e-06	7.32083e-07
Me199Hg	Mid DOC Cold	T3	7.696	4.359	0.00036325	3.5491e-07	3.337	0.000278083	1.94658e-06	9.73292e-07
Me199Hg	Mid DOC Cold	T4	6.896	4.356	0.000363	3.54666e-07	2.54	0.000211667	1.48167e-06	7.40833e-07
Me199Hg	No DOC Cold	T0	3.53	0	0	0	3.53	0.000294167	2.05917e-06	1.02958e-06
Me199Hg	No DOC Cold	T1	3.193	0	0	0	3.193	0.000266083	1.86258e-06	9.31292e-07
Me199Hg	No DOC Cold	T2	2.51	0	0	0	2.51	0.000209167	1.46417e-06	7.32083e-07
Me199Hg	No DOC Cold	T3	3.337	0	0	0	3.337	0.000278083	1.94658e-06	9.73292e-07
Me199Hg	No DOC Cold	T4	2.54	0	0	0	2.54	0.000211667	1.48167e-06	7.40833e-07
Me199Hg	No DOC/No AC	T0	9.682	0	0	0	9.682	0.000806833	5.64783e-06	2.82392e-06
Me199Hg	No DOC/No AC	T1	8.208	0	0	0	8.208	0.000684	4.788e-06	2.394e-06
Me199Hg	No DOC/No AC	T2	8.641	0	0	0	8.641	0.000720083	5.04058e-06	2.52029e-06
Me199Hg	No DOC/No AC	T3	7.466	0	0	0	7.466	0.000622167	4.35517e-06	2.17758e-06
Me199Hg	No DOC/No AC	T4	8.487	0	0	0	8.487	0.00070725	4.95075e-06	2.47537e-06

## Sheet: Isotherm Hg
				INPUTS										Hg RESULTS
				Cl-	HCO3-	Hg	Hg	SRHA	DOMRS					Hg(OH)2	HgClOH	HgCl42-	HgCl+	HgCl2	HgCl3-	HgHCO3+	Hg(CO3)22-	HgCO3	Hg2+	HgOH+	Hg(OH)3-	Hg(DOMRS)2	TOTAL
	Sample ID	Description	Note	(M)	(M)	(ng/L)	(M)	(mg/L)	(M)	O/C	solids	meas pH	I	(% tot)	(% tot)	(% tot)	(% tot)	(% tot)	(% tot)	(% tot)	(% tot)	(% tot)	(% tot)	(% tot)	(% tot)	(% tot)			OBS	VARIABLES	1:HG(OH)2	2:HGCLOH	2:HGCL4-2	2:HGCL+	2:HGCL2 (	2:HGCL3-1	2:HGHCO3+	2:HG(CO3)	2:HGCO3 (	2:HG+2	2:HGOH+	2:HG(OH)3	2:HG(DOMR	S:HG(OH)2	6:HGCL2	6:HG3O2CO	6:MONTROY	7:TOTAL H
	JS16_0121	PETG control	n/a	0.0465	0.0075	4.95914	2.46723e-11	0	0	C	OFF	8.16	Y	0.0381781	0.263158	0.0340081	2.1336e-06	0.45749	0.208907	2.18219e-08	3.65587e-05	0.000144534	5.46559e-12	1.95142e-07	8.13765e-09	3.15385e-09	1.00192		1	1	9.43e-13	6.5e-12	8.4e-13	5.27e-17	1.13e-11	5.16e-12	5.39e-19	9.03e-16	3.57e-15	1.35e-22	4.82e-18	2.01e-19	7.79e-20		1.3e-10	8.16e-28	4.11e-09	2.47e-11
	JS16_0122	PETG control	n/a	0.0465	0.0075	9.65288	4.80243e-11	0	0	C	OFF	8.15	Y	0.0366667	0.258333	0.0341667	2.14583e-06	0.458333	0.210417	2.20833e-08	3.52083e-05	0.0001425	5.5e-12	1.92292e-07	7.64583e-09	2.47917e-09	0.998097		1	1	1.76e-12	1.24e-11	1.64e-12	1.03e-16	2.2e-11	1.01e-11	1.06e-18	1.69e-15	6.84e-15	2.64e-22	9.23e-18	3.67e-19	1.19e-19		2.54e-10	5.46e-27	7.69e-09	4.8e-11
	JS16_0123	PETG control	n/a	0.0465	0.0075	24.0426	1.19615e-10	0	0	C	OFF	8.08	Y	0.028	0.231667	0.036	2.25833e-06	0.4825	0.221667	2.30833e-08	2.675e-05	0.0001275	5.78333e-12	1.71667e-07	4.95833e-09	1.45e-09	0.99999		1	1	3.36e-12	2.78e-11	4.32e-12	2.71e-16	5.79e-11	2.66e-11	2.77e-18	3.21e-15	1.53e-14	6.94e-22	2.06e-17	5.95e-19	1.74e-19		6.68e-10	4.42e-26	1.46e-08	1.2e-10
	JS16_0124	PETG control	n/a	0.0465	0.0075	51.197	2.54711e-10	0	0	C	OFF	8.07	Y	0.0268627	0.227843	0.0362353	2.27451e-06	0.486275	0.222745	2.32549e-08	2.56863e-05	0.000125098	5.80392e-12	1.6902e-07	4.66667e-09	9.21569e-10	1.00011		1	1	6.85e-12	5.81e-11	9.24e-12	5.8e-16	1.24e-10	5.68e-11	5.93e-18	6.55e-15	3.19e-14	1.48e-21	4.31e-17	1.19e-18	2.35e-19		1.43e-09	3.86e-25	2.99e-08	2.55e-10
	JS16_0125	PETG control	n/a	0.0465	0.0075	99.0158	4.92616e-10	0	0	C	OFF	7.84	Y	0.0104868	0.151116	0.0407708	2.55578e-06	0.547667	0.251521	2.59635e-08	9.85801e-06	8.23529e-05	6.55172e-12	1.11968e-07	1.07099e-09	4.46247e-10	1.00166		1	1	5.17e-12	7.45e-11	2.01e-11	1.26e-15	2.7e-10	1.24e-10	1.28e-17	4.86e-15	4.06e-14	3.23e-21	5.52e-17	5.28e-19	2.2e-19		3.11e-09	2.79e-25	2.26e-08	4.93e-10
	JS16_0151	²⁰¹Hg+DOC first, then AC	coal	0.0465	0.0075	4.87253	2.42415e-11	4.21338	1.67452e-07	C	OFF	8.38	Y	3.71488e-16	1.54132e-15	1.20248e-16	7.56198e-21	1.61157e-15	7.39669e-16	7.72727e-23	3.54545e-19	8.47107e-19	1.93388e-26	1.14463e-21	1.31405e-22	1	1		1	1	8.99e-27	3.73e-26	2.91e-27	1.83e-31	3.9e-26	1.79e-26	1.87e-33	8.58e-30	2.05e-29	4.68e-37	2.77e-32	3.18e-33	2.42e-11		4.49e-25	4.26e-70	3.93e-23	2.42e-11
	JS16_0152	²⁰¹Hg+DOC first, then AC	coal	0.0465	0.0075	9.88944	4.92012e-11	8.90791	3.54027e-07	C	OFF	8.28	Y	7.54065e-17	3.94309e-16	3.86179e-17	2.4187e-21	5.18293e-16	2.37805e-16	2.47967e-23	7.21545e-20	2.1748e-19	6.21951e-27	2.92683e-22	2.11382e-23	1	1		1	1	3.71e-27	1.94e-26	1.9e-27	1.19e-31	2.55e-26	1.17e-26	1.22e-33	3.55e-30	1.07e-29	3.06e-37	1.44e-32	1.04e-33	4.92e-11		2.94e-25	3.77e-71	1.62e-23	4.92e-11
	JS16_0153	²⁰¹Hg+DOC first, then AC	coal	0.0465	0.0075	25.5138	1.26935e-10	25.7394	1.02296e-06	C	OFF	8.2	Y	8.50394e-18	5.3622e-17	6.32283e-18	3.9685e-22	8.50394e-17	3.88189e-17	4.06299e-24	8.18898e-21	2.95276e-20	1.01575e-27	3.98425e-23	1.99213e-24	1	1		1	1	1.08e-27	6.81e-27	8.03e-28	5.04e-32	1.08e-26	4.93e-27	5.16e-34	1.04e-30	3.75e-30	1.29e-37	5.06e-33	2.53e-34	1.27e-10		1.24e-25	1.13e-72	4.73e-24	1.27e-10
	JS16_0154	²⁰¹Hg+DOC first, then AC	coal	0.0465	0.0075	48.7196	2.42386e-10	49.1503	1.95338e-06	C	OFF	8.05	Y	2.12397e-18	1.88843e-17	3.1405e-18	1.97107e-22	4.21488e-17	1.93388e-17	2.01653e-24	2.02893e-21	1.03719e-20	5.04132e-28	1.40083e-23	3.52066e-25	1	1		1	1	5.14e-28	4.57e-27	7.6e-28	4.77e-32	1.02e-26	4.68e-27	4.88e-34	4.91e-31	2.51e-30	1.22e-37	3.39e-33	8.52e-35	2.42e-10		1.18e-25	1.71e-73	2.25e-24	2.42e-10
	JS16_0155	²⁰¹Hg+DOC first, then AC	coal	0.0465	0.0075	95.8093	4.76663e-10	86.3002	3.42983e-06	C	OFF	7.92	Y	6.45702e-19	7.73585e-18	1.73795e-18	1.09015e-22	2.32704e-17	1.06918e-17	1.11111e-24	6.12159e-22	4.2348e-21	2.78826e-28	5.74423e-24	7.92453e-26	1	1		1	1	3.08e-28	3.69e-27	8.29e-28	5.2e-32	1.11e-26	5.1e-27	5.3e-34	2.92e-31	2.02e-30	1.33e-37	2.74e-33	3.78e-35	4.77e-10		1.28e-25	4.94e-74	1.35e-24	4.77e-10
	JS16_0156	²⁰¹Hg+DOC first, then AC	coco	0.0465	0.0075	5.07182	2.52329e-11	4.3857	1.74301e-07	C	OFF	8.38	Y	3.4246e-16	1.42063e-15	1.10714e-16	6.94444e-21	1.48413e-15	6.78571e-16	7.10317e-23	3.26587e-19	7.81746e-19	1.78175e-26	1.05556e-21	1.21032e-22	1	1		1	1	8.63e-27	3.58e-26	2.79e-27	1.75e-31	3.74e-26	1.71e-26	1.79e-33	8.23e-30	1.97e-29	4.49e-37	2.66e-32	3.05e-33	2.52e-11		4.31e-25	3.76e-70	3.77e-23	2.52e-11
	JS16_0157	²⁰¹Hg+DOC first, then AC	coco	0.0465	0.0075	9.711	4.83134e-11	8.74718	3.4764e-07	C	OFF	8.26	Y	7.68116e-17	4.2029e-16	4.30642e-17	2.71222e-21	5.7764e-16	2.6501e-16	2.77433e-23	7.3499e-20	2.31884e-19	6.93582e-27	3.12629e-22	2.06004e-23	1	1		1	1	3.71e-27	2.03e-26	2.08e-27	1.31e-31	2.79e-26	1.28e-26	1.34e-33	3.55e-30	1.12e-29	3.35e-37	1.51e-32	9.95e-34	4.83e-11		3.22e-25	3.94e-71	1.62e-23	4.83e-11
	JS16_0158	²⁰¹Hg+DOC first, then AC	coco	0.0465	0.0075	24.2314	1.20554e-10	24.4456	9.71542e-07	C	OFF	8.21	Y	9.50413e-18	5.81818e-17	6.69421e-18	4.19835e-22	9.00826e-17	4.1157e-17	4.30579e-24	9.09091e-21	3.19835e-20	1.07438e-27	4.31405e-23	2.26446e-24	1	1		1	1	1.15e-27	7.04e-27	8.1e-28	5.08e-32	1.09e-26	4.98e-27	5.21e-34	1.1e-30	3.87e-30	1.3e-37	5.22e-33	2.74e-34	1.21e-10		1.25e-25	1.3e-72	5e-24	1.21e-10
	JS16_0159	²⁰¹Hg+DOC first, then AC	coco	0.0465	0.0075	49.7136	2.47332e-10	50.1531	1.99324e-06	C	OFF	8.04	Y	2.02834e-18	1.84615e-17	3.1417e-18	1.97166e-22	4.21053e-17	1.93117e-17	2.01619e-24	1.93927e-21	1.01215e-20	5.06073e-28	1.36842e-23	3.2834e-25	1	1		1	1	5.01e-28	4.56e-27	7.76e-28	4.87e-32	1.04e-26	4.77e-27	4.98e-34	4.79e-31	2.5e-30	1.25e-37	3.38e-33	8.11e-35	2.47e-10		1.2e-25	1.62e-73	2.19e-24	2.47e-10
	JS16_0160	²⁰¹Hg+DOC first, then AC	coco	0.0465	0.0075	97.8799	4.86965e-10	88.1653	3.50396e-06	C	OFF	7.93	Y	6.2423e-19	7.28953e-18	1.60164e-18	1.00411e-22	2.15606e-17	9.85626e-18	1.02464e-24	5.91376e-22	4.00411e-21	2.56674e-28	5.42094e-24	7.82341e-26	1	1		1	1	3.04e-28	3.55e-27	7.8e-28	4.89e-32	1.05e-26	4.8e-27	4.99e-34	2.88e-31	1.95e-30	1.25e-37	2.64e-33	3.81e-35	4.87e-10		1.21e-25	4.61e-74	1.32e-24	4.87e-10
	JS16_0171	AC+DOC first, then ²⁰¹Hg	coal	0.0465	0.0075	5.02583	2.50041e-11	4.34594	1.72721e-07	C	OFF	8.5	Y	3.964e-16	1.248e-15	7.36e-17	4.64e-21	9.88e-16	4.52e-16	4.72e-23	3.756e-19	6.84e-19	1.188e-26	9.28e-22	1.852e-22	1	1		1	1	9.91e-27	3.12e-26	1.84e-27	1.16e-31	2.47e-26	1.13e-26	1.18e-33	9.39e-30	1.71e-29	2.97e-37	2.32e-32	4.63e-33	2.5e-11		2.85e-25	4.31e-70	4.33e-23	2.5e-11
	JS16_0172	AC+DOC first, then ²⁰¹Hg	coal	0.0465	0.0075	9.67961	4.81572e-11	8.7189	3.46516e-07	C	OFF	8.38	Y	8.60996e-17	3.56846e-16	2.78008e-17	1.74689e-21	3.73444e-16	1.70954e-16	1.78423e-23	8.21577e-20	1.96266e-19	4.48133e-27	2.6556e-22	3.04979e-23	1	1		1	1	4.15e-27	1.72e-26	1.34e-27	8.42e-32	1.8e-26	8.24e-27	8.6e-34	3.96e-30	9.46e-30	2.16e-37	1.28e-32	1.47e-33	4.82e-11		2.07e-25	4.18e-71	1.81e-23	4.82e-11
	JS16_0173	AC+DOC first, then ²⁰¹Hg	coal	0.0465	0.0075	24.0964	1.19883e-10	24.3094	9.66129e-07	C	OFF	8.31	Y	1.04167e-17	5.06667e-17	4.64167e-18	2.90833e-22	6.21667e-17	2.85e-17	2.975e-24	9.91667e-21	2.78333e-20	7.45833e-28	3.76667e-23	3.13333e-24	1	1		1	1	1.25e-27	6.08e-27	5.57e-28	3.49e-32	7.46e-27	3.42e-27	3.57e-34	1.19e-30	3.34e-30	8.95e-38	4.52e-33	3.76e-34	1.2e-10		8.6e-26	1.34e-72	5.44e-24	1.2e-10
	JS16_0174	AC+DOC first, then ²⁰¹Hg	coal	0.0465	0.0075	48.7596	2.42585e-10	49.1906	1.95498e-06	C	OFF	8.22	Y	2.37037e-18	1.42387e-17	1.60082e-18	1.00412e-22	2.14403e-17	9.83539e-18	1.02881e-24	2.2716e-21	7.81893e-21	2.57202e-28	1.05761e-23	5.80247e-25	1	1		1	1	5.76e-28	3.46e-27	3.89e-28	2.44e-32	5.21e-27	2.39e-27	2.5e-34	5.52e-31	1.9e-30	6.25e-38	2.57e-33	1.41e-34	2.43e-10		6.01e-26	1.62e-73	2.51e-24	2.43e-10
	JS16_0175	AC+DOC first, then ²⁰¹Hg	coal	0.0465	0.0075	98.1682	4.88399e-10	88.425	3.51428e-06	C	OFF	8.08	Y	6.65984e-19	5.53279e-18	8.58607e-19	5.38934e-23	1.15164e-17	5.28689e-18	5.5123e-25	6.37295e-22	3.03279e-21	1.3791e-28	4.09836e-24	1.18238e-25	1	1		1	1	3.25e-28	2.7e-27	4.19e-28	2.63e-32	5.62e-27	2.58e-27	2.69e-34	3.11e-31	1.48e-30	6.73e-38	2e-33	5.77e-35	4.88e-10		6.48e-26	4.04e-74	1.42e-24	4.88e-10
	JS16_0176	AC+DOC first, then ²⁰¹Hg	coco	0.0465	0.0075	4.98395	2.47958e-11	4.30972	1.71281e-07	C	OFF	8.47	Y	3.91129e-16	1.31855e-15	8.34677e-17	5.24194e-21	1.12097e-15	5.12097e-16	5.3629e-23	3.71774e-19	7.21774e-19	1.34677e-26	9.79839e-22	1.70565e-22	1	1		1	1	9.7e-27	3.27e-26	2.07e-27	1.3e-31	2.78e-26	1.27e-26	1.33e-33	9.22e-30	1.79e-29	3.34e-37	2.43e-32	4.23e-33	2.48e-11		3.2e-25	4.34e-70	4.23e-23	2.48e-11
	JS16_0177	AC+DOC first, then ²⁰¹Hg	coco	0.0465	0.0075	10.2591	5.10405e-11	9.24093	3.67262e-07	C	OFF	8.45	Y	7.84314e-17	3.11765e-16	1.83725e-17	1.15294e-21	3.11765e-16	1.43137e-16	7.19608e-21	2.19608e-14	1.0451e-16	1.83725e-27	1.82745e-22	2.90196e-23	1	1		1	1	4e-27	1.59e-26	9.37e-28	5.88e-32	1.59e-26	7.3e-27	3.67e-31	1.12e-24	5.33e-27	9.37e-38	9.32e-33	1.48e-33	5.1e-11		1.84e-25	2.19e-68	1.75e-23	5.1e-11
	JS16_0178	AC+DOC first, then ²⁰¹Hg	coco	0.0465	0.0075	24.686	1.22816e-10	24.9042	9.89769e-07	C	OFF	8.35	Y	1.00813e-17	4.69106e-17	3.74797e-18	2.34959e-22	5.47967e-17	2.5122e-17	1.25203e-21	2.4065e-15	1.34146e-17	5.04878e-28	3.18699e-23	3.18699e-24	1	1		1	1	1.24e-27	5.77e-27	4.61e-28	2.89e-32	6.74e-27	3.09e-27	1.54e-31	2.96e-25	1.65e-27	6.21e-38	3.92e-33	3.92e-34	1.23e-10		7.77e-26	6.54e-70	5.41e-24	1.23e-10
	JS16_0179	AC+DOC first, then ²⁰¹Hg	coco	0.0465	0.0075	49.3827	2.45685e-10	49.8193	1.97997e-06	C	OFF	8.22	Y	2.3252e-18	1.34553e-17	1.57317e-18	9.87805e-23	1.95528e-17	8.94309e-18	4.22764e-22	4.22764e-16	3.10163e-18	2.93902e-28	1.07724e-23	5.93496e-25	1	1		1	1	5.72e-28	3.31e-27	3.87e-28	2.43e-32	4.81e-27	2.2e-27	1.04e-31	1.04e-25	7.63e-28	7.23e-38	2.65e-33	1.46e-34	2.46e-10		5.54e-26	6.43e-71	2.5e-24	2.46e-10
	JS16_0180	AC+DOC first, then ²⁰¹Hg	coco	0.0465	0.0075	96.6856	4.81023e-10	87.0896	3.4612e-06	C	OFF	8.11	Y	7.17256e-19	5.05198e-18	8.04574e-19	5.05198e-23	8.93971e-18	4.09563e-18	1.77755e-22	9.7921e-17	9.56341e-19	1.87318e-28	4.51143e-24	1.4948e-25	1	1		1	1	3.45e-28	2.43e-27	3.87e-28	2.43e-32	4.3e-27	1.97e-27	8.55e-32	4.71e-26	4.6e-28	9.01e-38	2.17e-33	7.19e-35	4.81e-10		4.96e-26	1.4e-71	1.5e-24	4.81e-10

## Sheet: Isotherm MeHg
				Cl-	HCO3-	MeHg	MeHg	SRHA	DOMRS					MeHg+	MeHgHCO	MeHgCO3	MeHgOH	(MeHg)2OH+	MeHgCl	MeHgDOMRS	(MeHg)2OH	TOTAL
	Sample ID	Description	Note	(M)	(M)	(ng/L)	(M)	(mg/L)	(M)	O/C	solids	meas pH	I	(% tot)	(% tot)	(% tot)	(% tot)	(% tot)	(% tot)	(% tot)	(% tot)			OBS	VARIABLES	1:MEHG	2:MEHGHCO	2:MEHGCO3	2:MEHGOH	2:(MEHG)2	2:MEHGCL	2:MEHGDOM	2:(MEHG)2	7:TOTAL M
	JS16_0126	PETG control	n/a	0.0465	0.0075	5.02371	2.34753e-11	0	0	C	OFF	8.32	Y	8.80851e-05	0.000195745	0.00676596	0.46383	2.29787e-13	0.531915	3.84681e-08	1.77447e-21	1.00279		1	1	2.07e-15	4.6e-15	1.59e-13	1.09e-11	5.4e-24	1.25e-11	9.04e-19	4.17e-32	2.35e-11
	JS16_0127	PETG control	n/a	0.0465	0.0075	10.341	4.83227e-11	0	0	C	OFF	8.3	Y	8.98551e-05	0.000200207	0.00660455	0.451346	4.69979e-13	0.540373	1.96687e-08	3.80952e-21	0.998613		1	1	4.34e-15	9.67e-15	3.19e-13	2.18e-11	2.27e-23	2.61e-11	9.5e-19	1.84e-31	4.83e-11
	JS16_0128	PETG control	n/a	0.0465	0.0075	25.1757	1.17644e-10	0	0	C	OFF	8.23	Y	9.66102e-05	0.000215254	0.00604237	0.412712	1.12712e-12	0.580508	8.28814e-09	1.0678e-20	0.999575		1	1	1.14e-14	2.54e-14	7.13e-13	4.87e-11	1.33e-22	6.85e-11	9.78e-19	1.26e-30	1.18e-10
	JS16_0129	PETG control	n/a	0.0465	0.0075	50.3302	2.35188e-10	0	0	C	OFF	8.2	Y	9.91489e-05	0.000221277	0.00578723	0.39617	2.21702e-12	0.595745	4.20426e-09	2.25532e-20	0.998023		1	1	2.33e-14	5.2e-14	1.36e-12	9.31e-11	5.21e-22	1.4e-10	9.88e-19	5.3e-30	2.35e-10
	JS16_0130	PETG control	n/a	0.0465	0.0075	103.864	4.85345e-10	0	0	C	OFF	8.19	Y	0.000100206	0.00022268	0.00573196	0.391753	4.5567e-12	0.604124	2.04948e-09	4.74227e-20	1.00193		1	1	4.86e-14	1.08e-13	2.78e-12	1.9e-10	2.21e-21	2.93e-10	9.94e-19	2.3e-29	4.85e-10
	JS16_0161	Me¹⁹⁹Hg+DOC first, then AC	coal	0.0465	0.0075	4.89937	2.28942e-11	4.24	1.6851e-07	C	OFF	8.36	Y	1.67249e-09	3.72926e-09	9.56332e-08	6.50655e-06	5.98253e-23	1.00873e-05	1	6.24454e-31	1.00002		1	1	3.83e-20	8.54e-20	2.19e-18	1.49e-16	1.37e-33	2.31e-16	2.29e-11	1.43e-41	2.29e-11
	JS16_0162	Me¹⁹⁹Hg+DOC first, then AC	coal	0.0465	0.0075	9.91316	4.63232e-11	8.92928	3.54877e-07	C	OFF	8.28	Y	6.69546e-10	1.49244e-09	4.70842e-08	3.21814e-06	2.39741e-23	4.03888e-06	1	2.02376e-31	1.00001		1	1	3.1e-20	6.91e-20	2.18e-18	1.49e-16	1.11e-33	1.87e-16	4.63e-11	9.37e-42	4.63e-11
	JS16_0163	Me¹⁹⁹Hg+DOC first, then AC	coal	0.0465	0.0075	24.8835	1.16278e-10	25.1035	9.9769e-07	C	OFF	8.35	Y	2.09483e-10	4.65517e-10	1.72414e-08	1.18103e-06	6.87931e-24	1.25862e-06	1	4.9569e-32	1		1	1	2.43e-20	5.4e-20	2e-18	1.37e-16	7.98e-34	1.46e-16	1.16e-10	5.75e-42	1.16e-10
	JS16_0164	Me¹⁹⁹Hg+DOC first, then AC	coal	0.0465	0.0075	49.0379	2.29149e-10	49.4714	1.96614e-06	C	OFF	8.31	Y	1.1441e-10	2.54148e-10	8.60262e-09	5.85153e-07	3.68559e-24	6.8559e-07	1	2.9083e-32	1		1	1	2.62e-20	5.82e-20	1.97e-18	1.34e-16	8.44e-34	1.57e-16	2.29e-10	6.66e-42	2.29e-10
	JS16_0165	Me¹⁹⁹Hg+DOC first, then AC	coal	0.0465	0.0075	99.5203	4.65048e-10	89.6429	3.56268e-06	C	OFF	8.18	Y	8.10753e-11	1.8043e-10	4.51613e-09	3.09677e-07	2.7957e-24	4.88172e-07	1	2.96774e-32	1		1	1	3.77e-20	8.39e-20	2.1e-18	1.44e-16	1.3e-33	2.27e-16	4.65e-10	1.38e-41	4.65e-10
	JS16_0166	Me¹⁹⁹Hg+DOC first, then AC	coco	0.0465	0.0075	5.09113	2.37903e-11	4.4024	1.74965e-07	C	OFF	8.44	Y	1.01681e-09	2.2563e-09	1.02941e-07	7.05882e-06	4.10084e-23	6.13445e-06	1	2.39916e-31	1.00001		1	1	2.42e-20	5.37e-20	2.45e-18	1.68e-16	9.76e-34	1.46e-16	2.38e-11	5.71e-42	2.38e-11
	JS16_0167	Me¹⁹⁹Hg+DOC first, then AC	coco	0.0465	0.0075	10.0941	4.71686e-11	9.09224	3.61353e-07	C	OFF	8.45	Y	4.85169e-10	1.07415e-09	5.02119e-08	3.4322e-06	1.88771e-23	2.92373e-06	1	1.08051e-31	1.00001		1	1	2.29e-20	5.07e-20	2.37e-18	1.62e-16	8.91e-34	1.38e-16	4.72e-11	5.1e-42	4.72e-11
	JS16_0168	Me¹⁹⁹Hg+DOC first, then AC	coco	0.0465	0.0075	24.2784	1.13451e-10	24.4931	9.73429e-07	C	OFF	8.38	Y	2.0354e-10	4.52212e-10	1.79646e-08	1.23009e-06	6.77876e-24	1.22124e-06	1	4.55752e-32	1		1	1	2.3e-20	5.11e-20	2.03e-18	1.39e-16	7.66e-34	1.38e-16	1.13e-10	5.15e-42	1.13e-10
	JS16_0169	Me¹⁹⁹Hg+DOC first, then AC	coco	0.0465	0.0075	48.6523	2.27347e-10	49.0824	1.95068e-06	C	OFF	8.33	Y	1.11013e-10	2.47577e-10	8.76652e-09	5.99119e-07	3.62555e-24	6.69604e-07	1	2.73128e-32	1		1	1	2.52e-20	5.62e-20	1.99e-18	1.36e-16	8.23e-34	1.52e-16	2.27e-10	6.2e-42	2.27e-10
	JS16_0170	Me¹⁹⁹Hg+DOC first, then AC	coco	0.0465	0.0075	96.5214	4.51034e-10	86.9416	3.45532e-06	C	OFF	8.25	Y	7.27273e-11	1.62084e-10	4.76718e-09	3.25942e-07	2.57206e-24	4.39024e-07	1	2.32816e-32	1		1	1	3.28e-20	7.31e-20	2.15e-18	1.47e-16	1.16e-33	1.98e-16	4.51e-10	1.05e-41	4.51e-10
	JS16_0181	DOC+AC first, then Me¹⁹⁹Hg	coal	0.0465	0.0075	4.9955	2.33435e-11	4.31971	1.71678e-07	C	OFF	8.51	Y	9.18455e-10	2.03433e-09	1.09013e-07	7.46781e-06	3.84549e-23	5.53648e-06	1	1.91416e-31	1.00001		1	1	2.14e-20	4.74e-20	2.54e-18	1.74e-16	8.96e-34	1.29e-16	2.33e-11	4.46e-42	2.33e-11
	JS16_0182	DOC+AC first, then Me¹⁹⁹Hg	coal	0.0465	0.0075	10.1221	4.72994e-11	9.11746	3.62355e-07	C	OFF	8.37	Y	5.56025e-10	1.2389e-09	4.79915e-08	3.27696e-06	2.07822e-23	3.36152e-06	1	1.42706e-31	1.00001		1	1	2.63e-20	5.86e-20	2.27e-18	1.55e-16	9.83e-34	1.59e-16	4.73e-11	6.75e-42	4.73e-11
	JS16_0183	DOC+AC first, then Me¹⁹⁹Hg	coal	0.0465	0.0075	24.5908	1.1491e-10	24.8082	9.85953e-07	C	OFF	8.36	Y	2.07826e-10	4.62609e-10	1.75652e-08	1.2e-06	6.89565e-24	1.25217e-06	1	4.85217e-32	1		1	1	2.39e-20	5.32e-20	2.02e-18	1.38e-16	7.93e-34	1.44e-16	1.15e-10	5.58e-42	1.15e-10
	JS16_0184	DOC+AC first, then Me¹⁹⁹Hg	coal	0.0465	0.0075	49.5246	2.31423e-10	49.9624	1.98566e-06	C	OFF	8.29	Y	1.17316e-10	2.61472e-10	8.44156e-09	5.75758e-07	3.74892e-24	7.05628e-07	1	3.09524e-32	1		1	1	2.71e-20	6.04e-20	1.95e-18	1.33e-16	8.66e-34	1.63e-16	2.31e-10	7.15e-42	2.31e-10
	JS16_0185	DOC+AC first, then Me¹⁹⁹Hg	coal	0.0465	0.0075	100.488	4.69572e-10	81.7222	3.24789e-06	C	OFF	8.28	Y	7.31915e-11	1.62979e-10	5.14894e-09	3.51064e-07	2.89362e-24	4.40426e-07	1	2.44681e-32	1		1	1	3.44e-20	7.66e-20	2.42e-18	1.65e-16	1.36e-33	2.07e-16	4.7e-10	1.15e-41	4.7e-10
	JS16_0186	DOC+AC first, then Me¹⁹⁹Hg	coco	0.0465	0.0075	4.88091	2.2808e-11	4.22062	1.6774e-07	C	OFF	8.52	Y	9.25439e-10	2.04825e-09	1.12281e-07	7.7193e-06	3.90351e-23	5.57018e-06	1	1.89912e-31	1.00001		1	1	2.11e-20	4.67e-20	2.56e-18	1.76e-16	8.9e-34	1.27e-16	2.28e-11	4.33e-42	2.28e-11
	JS16_0187	DOC+AC first, then Me¹⁹⁹Hg	coco	0.0465	0.0075	9.84989	4.60275e-11	8.87229	3.52612e-07	C	OFF	8.5	Y	4.54348e-10	1.0087e-09	5.28261e-08	3.63043e-06	1.82174e-23	2.73913e-06	1	9.28261e-32	1.00001		1	1	2.09e-20	4.64e-20	2.43e-18	1.67e-16	8.38e-34	1.26e-16	4.6e-11	4.27e-42	4.6e-11
	JS16_0188	DOC+AC first, then Me¹⁹⁹Hg	coco	0.0465	0.0075	24.1187	1.12704e-10	24.3319	9.67024e-07	C	OFF	8.45	Y	1.81416e-10	4.0177e-10	1.87611e-08	1.28319e-06	6.30088e-24	1.0885e-06	1	3.60177e-32	1		1	1	2.05e-20	4.54e-20	2.12e-18	1.45e-16	7.12e-34	1.23e-16	1.13e-10	4.07e-42	1.13e-10
	JS16_0189	DOC+AC first, then Me¹⁹⁹Hg	coco	0.0465	0.0075	49.2922	2.30337e-10	49.7279	1.97634e-06	C	OFF	8.44	Y	9e-11	1.99565e-10	9.08696e-09	6.21739e-07	3.09565e-24	5.3913e-07	1	1.81304e-32	1		1	1	2.07e-20	4.59e-20	2.09e-18	1.43e-16	7.12e-34	1.24e-16	2.3e-10	4.17e-42	2.3e-10
	JS16_0190	DOC+AC first, then Me¹⁹⁹Hg	coco	0.0465	0.0075	100.786	4.70963e-10	81.9643	3.25751e-06	C	OFF	8.31	Y	6.90021e-11	1.53715e-10	5.2017e-09	3.54565e-07	2.76008e-24	4.16136e-07	1	2.18684e-32	1		1	1	3.25e-20	7.24e-20	2.45e-18	1.67e-16	1.3e-33	1.96e-16	4.71e-10	1.03e-41	4.71e-10

## Sheet: Slurry speciation inputs
Slurry microcosm inputs for speciation modeling
Averages over time points and isotope spikes
Treatment	pH	H+ (M)	Fe (M)	HS- (M)	Cl- (M)	Hg (M)	MeHg (M)	RS (thiols, M)	201Hg (M)
No DOM/No AC	7.195	6.38263e-08	8.99622e-06	0.000481336	0.0176685	2.46136e-10	6.83123e-11	2.64542e-06	1.42279e-09
No DOM	7.14222	7.20739e-08	2.1114e-06	0.00044548	0.0222782	5.4028e-11	1.16338e-11	8.86142e-07	2.49327e-11
Low DOM	7.319	4.79733e-08	2.19663e-06	0.00047076	0.020682	6.0807e-11	1.08162e-11	2.0434e-06	2.07368e-10
Mid DOM	7.479	3.31894e-08	2.0575e-06	0.00045022	0.0183936	8.30977e-11	9.05571e-12	2.37146e-06	4.04096e-10
High DOM	6.8015	1.57943e-07	4.92076e-06	0.0004613	0.0162387	1.12767e-10	1.46459e-11	1.663e-06	4.3533e-10

## Sheet: Microcosm KAC estimates
Estimate KAC for slurries
Don't include T0
Assume 5% dry wt AC
				KD	KD	KD	KAC	KAC	KAC		KD THG		Amb AVG	BDL	KAC	KAC
HG SPIKE	Treatment	TIME POINT	time (days)	Me199Hg	Me201Hg	Amb MeHg	Me199Hg	Me201Hg	Amb MeHg		BDL	201Hg	Amb Hg	199Hg	201Hg	Amb Hg
201Hg	No DOC/No AC	T0	0		1083.69	4346.01						3278.31	11454.3
		T1	1									8930.53	349831
		T2	3		1311.42	6611.99						15255.3	472514
		T3	7		1004.69	7053.76						13122	408915
		T4	21		1876.25	10948.6						18570.2	190462
	No DOC Cold	T0	0		9765.97	32660.5						120418	1.03678e+06
		T1	1									584391	2.21417e+06		1.15181e+07	3.76366e+07
		T2	3		13673.3	64550.5		248548	1.16538e+06			64800.6	101704
		T3	7		6381.97	96395.6		108550	1.79389e+06			760674	2.39951e+06		1.49642e+07	4.02208e+07
		T4	21		26630.3	87071.4		496957	1.5334e+06			1.60988e+06	1.88476e+06		3.18447e+07	3.40765e+07
Me199Hg	No DOC/No AC	T0	0	215.599		2462.76							503417
		T1	1										351571
		T2	3	587.948		4403.68							622633
		T3	7	1177.42		5015.4							119643
		T4	21	3038.03		15668.9							804567
	No DOC Cold	T0	0	4640.98		21841.2							1.86395e+06
		T1	1										1.81897e+06			2.96995e+07
		T2	3	17508.3		43674.7	789824		789824				1.58041e+06			1.97781e+07
		T3	7	33995.7		86048.2	1.62567e+06		1.62567e+06				2.27913e+06			4.33093e+07
		T4	21	37686.3		70449	1.11127e+06		1.11127e+06				3000000			4.47132e+07
							KAC	KAC	KAC						KAC	KAC
							Me199Hg	Me201Hg	Amb MeHg						201Hg	Amb Hg
						AVG	1.17559e+06	284685	1.33657e+06					AVG KAC	1.94423e+07	3.56334e+07
						STD	421619	196709	376952					STD	1.08781e+07	8.71249e+06
						RSD	0.358645	0.69097	0.282028					RSD	0.559506	0.244503
						upper error bound	1.59721e+06	481394	1.71353e+06					upper error bound	3.03205e+07	4.43459e+07
						log	6.07026	5.45437	6.12599					log KAC	7.28875	7.55186
						'+/-	0.133106	0.228136	0.107898					+/-	0.192987	0.0949961
														HgCl2		6.55
					Kac isotherms	MeHgCl		4.9						HgDOM		4.53
						MeHgDOM		4.35
